# Supplementary material
Source: publisher figshare collection journal article supplement (https://tandf.figshare.com/articles/dataset/_/1166537)
Supplement: Supplementary file 2 [file 2]

## Supplemental material - Appendix A

This document describes the *material flow model* (MFM) in details. It presents mathematical basics of the formalism and introduces its properties. A short implementation note is also given.

### 1. Material flow model (MFM)

The MFM is a combination of three types of concepts: domains, data structures and procedures.

*Domains.* Each scalar parameter belongs to one of the four domains:  $T_{\mathcal{D}}$ ,  $F_{\mathcal{D}}$ ,  $S_{\mathcal{D}}$ ,  $D_{\mathcal{D}}$ , representing: time, material amount (flow), processing speed, and dimensionless (or percentage) values, respectively. Values from the first three domains have implicitly assigned units which satisfy the obvious relation

$$[F_{\mathcal{D}}] = [S_{\mathcal{D}}] \cdot [T_{\mathcal{D}}].$$

In the MFM time and material flow are considered to be continuous and values from all the defined domains belong to  $\mathbb{R}_+ \cup \{0\}$ .

*Data structures.* Data structures are compound data objects based on scalars from the domains. For each data structure two aspects are defined, namely *representation* which defines how to code the data structure by combination of scalars, and *interpretation* which determines meaning of the data structure in the MFM.

A data structure  $sp$  represents a speed pattern of production resource and  $SP_{\mathcal{S}}$  is the set of all such data structures. Representation of  $sp$  is defined by (1) as the sequence of pairs from  $T_{\mathcal{D}} \times S_{\mathcal{D}}$ .

$$sp = \left( (t_i, s_i) \Big|_{i=1,2,\dots,n} \right), \quad sp \in SP_{\mathcal{S}}, t_i \in T_{\mathcal{D}}, s_i \in S_{\mathcal{D}}, \quad \forall_{i \in \{1,2,\dots,n-1\}} (t_i < t_{i+1} \wedge s_i \neq s_{i+1}). \quad (1)$$

The data structure  $sp$  is interpreted according to (2a,b) as a piecewise constant time-varying function, obtained by zero order backward linear interpolation based on points defined by  $sp$  representation.

$$sp(\cdot) : T_{\mathcal{D}} \longrightarrow S_{\mathcal{D}}, \quad (2a)$$

$$s = sp(t) = \left( (t_i, s_i) \Big|_{i=1,2,\dots,n} \right) (t) = \begin{cases} s_1 & \text{if } 0 \leq t < t_1 \\ s_{i+1} & \text{if } t_i \leq t < t_{i+1} \Big|_{i=1,2,\dots,n-1} \\ 0 & \text{if } t_n \leq t \end{cases}. \quad (2b)$$

The speed pattern will also be alternatively represented by multiplication of a *nominal speed*  $u \in S_{\mathcal{D}}$  and an *efficiency pattern*  $ep \in EP_{\mathcal{S}}$ , such that

$$sp = \left( (t_i, s_i) \Big|_{i=1,2,\dots,n} \right) = \left( (t_i, u \cdot e_i) \Big|_{i=1,2,\dots,n} \right) = u \cdot \left( (t_i, e_i) \Big|_{i=1,2,\dots,n} \right) = u \cdot ep,$$

where the data structure  $ep \in EP_S$  is defined in the same way as  $sp \in SP_S$ , except that  $e_i \in D_D$  whereas  $s_i \in S_D$ .

A data structure  $mf$  represents material flow in a production system and  $MF_S$  is the set of all such data structures. Representation of  $mf$  is defined by (3a,b) as the sequence of pairs from  $T_D \times F_D$ .

$$mf = \left( (t_i, f_i) \Big|_{i=1,2,\dots,n} \right), \quad mf \in MF_S, \quad t_i \in T_D, \quad f_i \in F_D, \quad (3a)$$

$$f_1 = 0, \quad \forall_{i \in \{1,2,\dots,n-1\}} (t_i < t_{i+1} \wedge f_i \leq f_{i+1}), \quad \neg \exists_{i \in \{1,2,\dots,n-2\}} \frac{f_{i+1} - f_i}{t_{i+1} - t_i} = \frac{f_{i+2} - f_{i+1}}{t_{i+2} - t_{i+1}}. \quad (3b)$$

The data structure  $mf$  is interpreted according to (4a,b) as a function obtained by the first order linear interpolation based on points defined by  $mf$  representation

$$mf(\cdot) : T_D \longrightarrow F_D, \quad (4a)$$

$$f = mf(t) = \left( (t_i, f_i) \Big|_{i=1,2,\dots,n} \right) (t) = \begin{cases} 0 & \text{if } 0 \leq t < t_1 \\ \frac{f_{i+1} - f_i}{t_{i+1} - t_i} (t - t_i) + f_i & \text{if } t_i \leq t < t_{i+1} \Big|_{i=1,2,\dots,n-1} \\ f_n & \text{if } t_n \leq t \end{cases} \quad (4b)$$

*Procedures.* Procedures are formal representations of computational algorithms that return some data related to the MFM.

The procedure  $OMF_P$  (*output material flow*) computes output material flow  $mf_{out}$  that is the result of processing performed by a resource with a given speed pattern  $sp$  characterized by start time  $t_s$  and total amount of processed material  $f_{max}$  (5). One assumes that at any time sufficient amount of material for processing inflows from a storehouse or a previous process.

$$OMF_P : SP_S \times T_D \times F_D \longrightarrow MF_S, \quad mf_{out} = OMF_P(sp, t_s, f_{max}). \quad (5)$$

The output material flow  $mf_{out}$  is defined by the function

$$mf_{out}(t) = \begin{cases} 0 & \text{if } 0 \leq t < t_s \\ \int_{t_s}^t sp(\tau) d\tau & \text{if } t_s \leq t < t_c \\ f_{max} & \text{if } t_c \leq t \end{cases} \quad (6)$$

The parameter  $t_c$  in (6) is the upper limit of the integral (7)

$$\int_{t_s}^{t_c} sp(\tau) d\tau = f_{max}. \quad (7)$$

The definitions (2a,b) and (4a,b) implicate that the indefinite integral of any function given by a data structure from  $SP_S$  is represented by a function given by a data structure included in  $MF_S$

$$\int sp(\tau) d\tau = mf^I(t), \quad sp \in SP_S, \quad mf^I \in MF_S.$$

To get the value of  $t_c$  from the relation (7) the inverse function of the indefinite integral  $mf^I(t)$  is needed. However, the function  $mf^I(t)$  is in general not injective and thus its inverse does not exist in the strict sense. Therefore a special inverse function  $\widetilde{mf^I}(f)$  defined by (8a,b,c) is used. This function assigns to each value of the material flow  $f \in [0, f_{\max}]$  the minimum value of time  $t$  from the function  $mf^I(t)$ . This is justified, because the material flow retaining some value in the time range  $[t_1, t_2]$  reaches this flow at the moment  $t_1$ .

$$\forall_{mf^I \in MF_S} \quad \exists_{\widetilde{mf^I}} \quad mf^I = \left( (t_i, f_i) \Big|_{i=1,2,\dots,n} \right) \implies \widetilde{mf^I} = \left( (f_i, t_i) \Big|_{i=1,2,\dots,n} \right), \quad (8a)$$

$$\widetilde{mf^I}(\cdot) : F_{\mathcal{D}}^{[0, f_{\max}]} \longrightarrow T_{\mathcal{D}}, \quad (8b)$$

$$\widetilde{mf^I}(f) = \left( (f_i, t_i) \Big|_{i=1,2,\dots,n} \right) (f) = \begin{cases} 0 & \text{if } f = 0 \\ \frac{t_{i+1}-t_i}{f_{i+1}-f_i} (f - f_i) + t_i & \text{if } f_i < f \leq f_{i+1} \Big|_{i=1,2,\dots,n-1} \end{cases}. \quad (8c)$$

Now, the value  $t_c$  can be calculated as follows

$$\int_{t_s}^{t_c} sp(\tau) d\tau = f_{\max} \implies mf^I(\tau) \Big|_{t_s}^{t_c} = f_{\max} \implies t_c = \widetilde{mf^I}(mf^I(t_s) + f_{\max}). \quad (9)$$

It is important to notice that the function  $t_c(t_s)$  characterized by (9) is non-decreasing, because  $\widetilde{mf^I}(\cdot)$  is strictly increasing and its argument  $mf^I(t_s) + f_{\max}$  is non-decreasing. The parameters  $t_s$  and  $t_c$  will be called *start time* and *completion time* of an operation represented by  $mf$ .

The procedure  $\text{CMT}_{\mathcal{P}}$  (*completion time*) returning the value of  $t_c$  on the basis of the parameters  $sp$ ,  $t_s$  and  $f_{\max}$ , according to (9), is defined as

$$t_c = \text{CMT}_{\mathcal{P}}(sp, t_s, f_{\max}), \quad \text{CMT}_{\mathcal{P}} : \text{SP}_{\mathcal{S}} \times T_{\mathcal{D}} \times F_{\mathcal{D}} \longrightarrow T_{\mathcal{D}}. \quad (10)$$

The material flow returned by the procedure  $\text{OMF}_{\mathcal{P}}$  is reliable only if there is enough amount of material inflowing to the input of the process. If this inflowing material is represented by the data structure  $mf_{\text{in}} \in MF_S$  and the processing machine has the speed pattern  $sp_{\text{out}} \in \text{SP}_{\mathcal{S}}$ , the *earliest start time*  $t_{\text{es}}$  can be defined that ensures reliability of the procedure  $\text{OMF}_{\mathcal{P}}$

$$t_{\text{es}} = \min \left\{ t \in [t_{s,\text{in}}, t_{c,\text{in}}] \mid \forall_{\tau \in [t, t_{c,\text{in}}]} mf_{\text{in}}(\tau) + mf_{\text{out}}^I(t) - mf_{\text{out}}^I(\tau) \geq bf \cdot f_{\max} \right\}, \quad (11)$$

where  $t_{s,\text{in}}$  and  $t_{c,\text{in}}$  are the start and completion times of  $mf_{\text{in}}$ ,  $f_{\max}$  is the maximum flow of  $mf_{\text{in}}$  and  $mf_{\text{out}}^I$  is the indefinite integral of  $sp_{\text{out}}$ . The parameter  $bf$  (*buffer*) forces some additional margin between material flows  $mf_{\text{in}}$  and  $mf_{\text{out}}$  such that the relation is more general and more adequate for industrial practice. This margin is expressed as a fraction of the maximum flow and thus it has the values restricted to the range  $[0, 1]$ . It is assumed that the value of maximum flow ( $f_{\max}$ ) is the same for both material flows being in the in-out relation.

In this work, the material flow used as  $mf_{\text{in}}$  in calculations of  $t_{\text{es}}$  will always be equal to the output material flow of the preceding operation. Hence,  $mf_{\text{in}}$  can be considered as the result from some machine working with the speed pattern  $sp_{\text{in}}$  that has the indefinite integral  $mf_{\text{in}}^I$ , and the

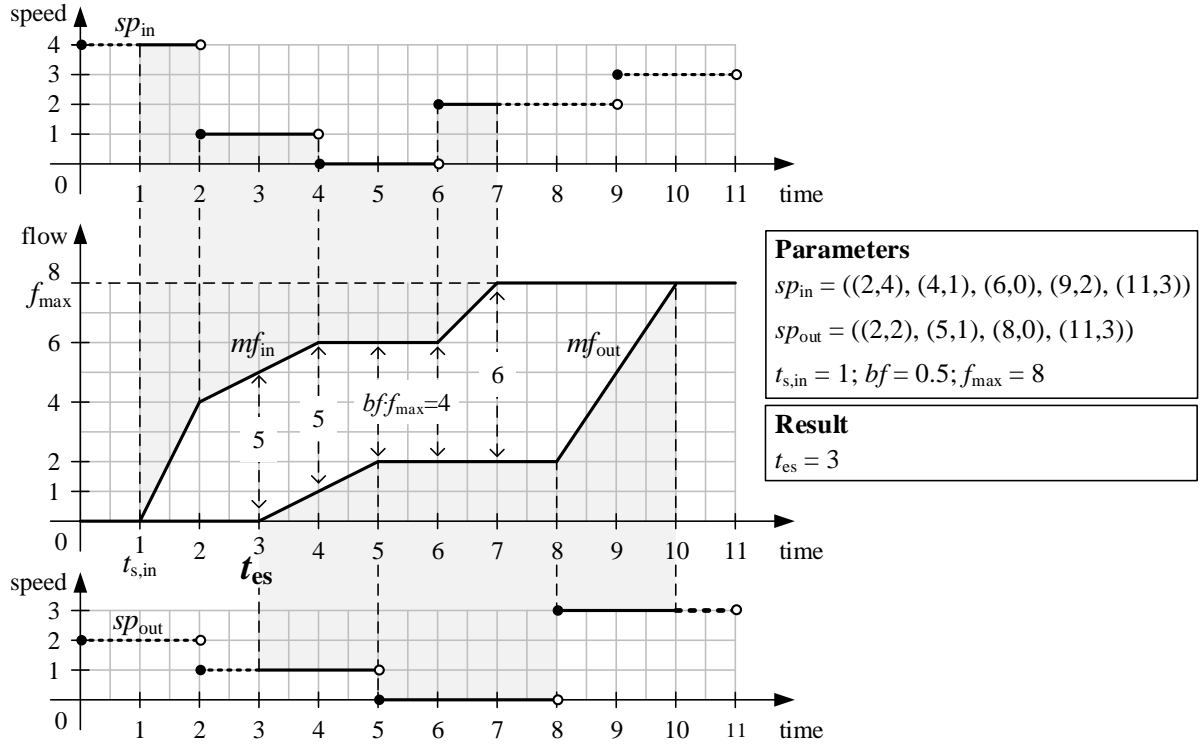

Figure 1. Interpretation of the earliest start time ( $t_{es}$ ).

substitution is possible

$$mf_{in}(\tau) \mapsto mf_{in}^I(\tau) - mf_{in}^I(t_{s,in}). \quad (12)$$

After this substitution, the relation (11) takes the form

$$t_{es} = \min \left\{ t \in [t_{s,in}, t_{c,in}] \mid \forall_{\tau \in [t, t_{c,in}]} mf_{in}^I(\tau) - mf_{in}^I(t_{s,in}) + mf_{out}^I(t) - mf_{out}^I(\tau) \geq bf \cdot f_{max} \right\}, \quad (13)$$

which is helpful in analysing the dependency between the start time  $t_{s,in}$  of some operation and earliest possible start time  $t_{es}$  of a next operation in the processing sequence. An example is presented on Figure 1 which additionally explains relation (13). This relation is the base of the procedure  $EST_{\mathcal{P}}$  (*earliest start time*) defined as

$$EST_{\mathcal{P}} : T_{\mathcal{D}} \times SP_{\mathcal{S}} \times SP_{\mathcal{S}} \times D_{\mathcal{D}}^{[0,1]} \times F_{\mathcal{D}} \longrightarrow T_{\mathcal{D}} \quad t_{es} = EST_{\mathcal{P}}(t_{s,in}, sp_{in}, sp_{out}, bf, f_{max}). \quad (14)$$

Finally, the *material flow model* is the 10-tuple of the previously introduced concepts

$$MFM = (T_{\mathcal{D}}, F_{\mathcal{D}}, S_{\mathcal{D}}, D_{\mathcal{D}}, MF_{\mathcal{S}}, SP_{\mathcal{S}}, EP_{\mathcal{S}}, OMF_{\mathcal{P}}, CMT_{\mathcal{P}}, EST_{\mathcal{P}}).$$

## 2. MFM properties

The following two properties of the MFM have a significant impact on features of scheduling problems defined on the basis of it.

**MFM Property 1.** The completion time of an operation is a non-decreasing function of its start time, i.e.

$$\forall_{\substack{sp \in \text{SP}_{\mathcal{S}} \\ t_{s_1}, t_{s_2} \in \mathbb{T}_{\mathcal{D}} \\ f_{\max} \in \mathbb{F}_{\mathcal{D}} \wedge f_{\max} > 0}} t_{s_2} > t_{s_1} \implies \text{CMT}_{\mathcal{P}}(sp, t_{s_2}, f_{\max}) \geq \text{CMT}_{\mathcal{P}}(sp, t_{s_1}, f_{\max}).$$

**MFM Property 2.** The earliest start time of an operation is a non-decreasing function of the start time of the previous one, i.e.

$$\forall_{\substack{sp_{\text{in}}, sp_{\text{out}} \in \text{SP}_{\mathcal{S}} \\ t_{s_1}, t_{s_2} \in \mathbb{T}_{\mathcal{D}}, bf \in \mathbb{D}_{\mathcal{D}}^{[0,1]} \\ f_{\max} \in \mathbb{F}_{\mathcal{D}} \wedge f_{\max} > 0}} t_{s_2} > t_{s_1} \implies \text{EST}_{\mathcal{P}}(t_{s_2}, sp_{\text{in}}, sp_{\text{out}}, bf, f_{\max}) \geq \text{EST}_{\mathcal{P}}(t_{s_1}, sp_{\text{in}}, sp_{\text{out}}, bf, f_{\max}).$$

Property 1 reflects the fact that the function (9) is non-decreasing, as it has been noticed earlier. In classic scheduling problems processing times are usually constant, i.e. for any operation

$$\left[ \forall_{t_s, t_c \in \mathbb{T}} p = t_c - t_s = \text{const} \right] \implies \left[ \forall_{t_{s_1}, t_{s_2}, t_{c_1}, t_{c_2} \in \mathbb{T}} t_{s_2} > t_{s_1} \implies t_{c_2} > t_{c_1} \right],$$

where  $p$  is processing time of the operation and  $\mathbb{T}$  is the time domain of the relevant scheduling problem. In the problems formulated using the MFM only the weaker relation, given by Property 1, takes place.

Property 2 can be proved as follows

*Proof.* (MFM Property 2)

Let us assume that material inflowing to some process B as a result of a preceding operation A performed by a machine with speed pattern  $sp_{\text{in}} \in \text{SP}_{\mathcal{S}}$ , starts at the time  $t_{s_1} \in \mathbb{T}_{\mathcal{D}}$  and has the maximum flow  $f_{\max} \in \mathbb{F}_{\mathcal{D}}$ . The process B is to be performed by a machine with speed pattern  $sp_{\text{out}} \in \text{SP}_{\mathcal{S}}$ , and the minimum material buffer between the operations A and B is defined as  $bf \in \mathbb{D}_{\mathcal{D}}^{[0,1]}$ . Under these conditions, the earliest start time for the operation B equals

$$t_{\text{es}_1} = \text{EST}_{\mathcal{P}}(t_{s_1}, sp_{\text{in}}, sp_{\text{out}}, bf, f_{\max}).$$

Let us select an optional  $t_{s_2} \in \mathbb{T}_{\mathcal{D}}$  such that

$$t_{s_2} > t_{s_1} \wedge t_{\text{es}_2} = \text{EST}_{\mathcal{P}}(t_{s_2}, sp_{\text{in}}, sp_{\text{out}}, bf, f_{\max}). \quad (15)$$

From (13) we obtain

$$\forall_{\tau \in [t_{\text{es}_2}, t_{c_2}]} mf_{\text{in}}^{\text{I}}(\tau) - mf_{\text{in}}^{\text{I}}(t_{s_2}) + mf_{\text{out}}^{\text{I}}(t_{\text{es}_2}) - mf_{\text{out}}^{\text{I}}(\tau) \geq bf \cdot f_{\max}, \quad (16)$$

where  $t_{c_2} = \text{CMT}_{\mathcal{P}}(sp_{\text{in}}, t_{s_2}, f_{\text{max}})$ . On the basis of (16) the following also holds

$$\forall_{\tau \in [t_{\text{es}_2}, t_{c_1}]} mf_{\text{in}}^{\text{I}}(\tau) - mf_{\text{in}}^{\text{I}}(t_{s_1}) + mf_{\text{out}}^{\text{I}}(t_{\text{es}_2}) - mf_{\text{out}}^{\text{I}}(\tau) \geq bf \cdot f_{\text{max}}, \quad (17)$$

because  $t_{c_2} \geq t_{c_1}$  that results from (15) and MFM Property 1, as well as  $mf_{\text{in}}^{\text{I}}(t_{s_2}) \geq mf_{\text{in}}^{\text{I}}(t_{s_1})$ , since  $mf_{\text{in}}^{\text{I}}(\cdot)$  is non-decreasing. From the initial assumption and sentences (17), (13) we can conclude

$$[t_{\text{es}_2}, t_{c_1}] \subseteq [t_{\text{es}_1}, t_{c_1}] \implies t_{\text{es}_2} \geq t_{\text{es}_1}.$$

□

### 3. MFM implementation note

The algorithmic layer of the MFM is based on the procedures  $\text{OMF}_{\mathcal{P}}$ ,  $\text{CMT}_{\mathcal{P}}$  and  $\text{EST}_{\mathcal{P}}$ . The procedures  $\text{OMF}_{\mathcal{P}}$  (*output material flow*) and  $\text{CMT}_{\mathcal{P}}$  (*completion time*) have identical list of arguments ( $sp, t_s, f_{\text{max}}$ ). In fact, the two procedures perform equivalent computations with the difference that  $\text{OMF}_{\mathcal{P}}$  returns a complete material flow function, whereas  $\text{CMT}_{\mathcal{P}}$  returns only a specially extracted parameter of this function. In both cases, simple computations are executed for integrating a piecewise constant time-varying function and finding the argument for which the resulting function reaches the value  $f_{\text{max}}$ .

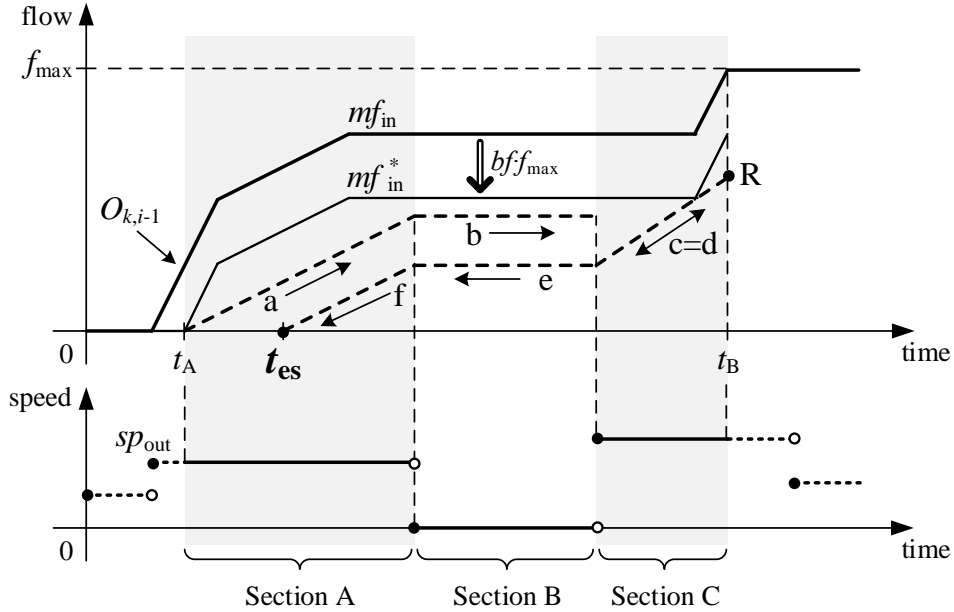

Figure 2. Graphical interpretation of the procedure  $\text{EST}_{\mathcal{P}}$  implementation.

The algorithm related to the procedure  $\text{EST}_{\mathcal{P}}$  is more complex. An example is presented on Figure 2 which shows graphical interpretation of the procedure implementation. The input data consists of the parameters:  $mf_{\text{in}}$ ,  $sp_{\text{out}}$ ,  $bf$ ,  $f_{\text{max}}$ . The input material flow  $mf_{\text{in}}$  is given arbitrary for simplicity, however, it can also be represented by input speed pattern  $sp_{\text{in}}$  and start time  $t_{s,\text{in}}$  of the operation  $O_{k,i-1}$ , as it is defined in (12) and (13). Hence, the input data is actually equal to that defined for the procedure  $\text{EST}_{\mathcal{P}}$  (14). The resulting value of the parameter  $t_{\text{es}}$  is obtained by means of the following operations

- Shift  $mf_{in}$  vertically down by the absolute value of minimal buffer, i.e.  $bf \cdot f_{max}$ . Denote shifted plot by  $mf_{in}^*$ .
- Select the two time values:  $t_A$ , i.e. the maximum time for which  $mf_{in}^*$  has the value 0, and  $t_B$ , i.e. the minimum time for which  $mf_{in}$  has the value  $f_{max}$ .
- Split the interval  $[t_A, t_B]$  into sections where the value of  $sp_{out}$  remains constant (sections A, B, C on Figure 2).
- For each section, from left to right, consecutively construct a line segment which has slope defined by  $sp_{out}$  and is located as high as possible, but respecting the following constraints
  - each point of the line segment has to be not higher than a point of  $mf_{in}^*$  for the same time argument (the constraint active for the line segments a and c on Figure 2), and also
  - the location of a line segment that leads to connection with preceding one is the highest possible for a line segment in each section, except for the first (the constraint active for the line segment b on Figure 2).
- Denote the last point in the last section as R.
- Construct a polyline starting from the point R by adding in each section, from right to left, a line segment with slope defined by  $sp_{out}$  (the line segments d, e and f on Figure 2). This polyline crosses the time axis at  $t_{es}$ .

The described algorithm can be easily implemented in a chosen programming language. In the implementation the geometric operations have to be substituted by analytic geometry transformations.
